# Supplementary material for: Tissue distribution and transmission of Rift Valley fever phlebovirus in European Culex pipiens and Aedes albopictus mosquitoes following intrathoracic inoculation
Source: PubMed Central journal article supplement (PMC11649246; doi:10.1099/jgv.0.002025), 2024-09-20
Supplement: jgv-105-02025-s001.pdf [file jgv-105-02025-s001.pdf]

**Supplementary Table 1.** Summary of Rift Valley fever virus antigen semiquantitative scoring system at 5- and 14-days-post-infection (mean  $\pm$  SD) in different anatomical structures of *Culex pipiens* and *Aedes albopictus* and summary of p-values of the analyses including variations in scoring system between species (interspecific) and within a species at different days-post-infection (intraspecific).

|                           | <i>Culex pipiens</i> |      |        |      | <i>Aedes albopictus</i> |      |        |      | Interspecific |        | Intraspecific      |                       |
|---------------------------|----------------------|------|--------|------|-------------------------|------|--------|------|---------------|--------|--------------------|-----------------------|
|                           | 5dpi                 |      | 14 dpi |      | 5dpi                    |      | 14 dpi |      | 5 dpi         | 14 dpi | <i>Cx. pipiens</i> | <i>Ae. albopictus</i> |
|                           | Mean                 | SD   | Mean   | SD   | Mean                    | SD   | Mean   | SD   |               |        | 5 vs. 14 dpi       |                       |
| Head ganglia              |                      |      |        |      |                         |      |        |      |               |        |                    |                       |
| cortical layer            | 2.45                 | 0.37 | 3.00   | 0.00 | 1.45                    | 0.41 | 2.98   | 0.07 | <0.01         | 0.29   | <0.001             | <0.001                |
| neuropile                 | 2.31                 | 0.64 | 3.00   | 0.00 | 1.24                    | 0.50 | 2.98   | 0.07 | <0.01         | 0.29   | <0.01              | <0.001                |
| Thoracic ganglia          |                      |      |        |      |                         |      |        |      |               |        |                    |                       |
| cortical layer            | 2.92                 | 0.24 | 3.00   | 0.00 | 2.54                    | 0.47 | 2.89   | 0.31 | 0.08          | 0.32   | 0.32               | 0.17                  |
| neuropile                 | 2.92                 | 0.24 | 3.00   | 0.00 | 2.15                    | 0.52 | 2.70   | 0.41 | <0.01         | 0.03   | 0.32               | 0.06                  |
| Abdominal ganglia         |                      |      |        |      |                         |      |        |      |               |        |                    |                       |
| cortical layer            | 2.94                 | 0.17 | 3.00   | 0.00 | 2.50                    | 0.50 | 3.00   | 0.00 | 0.12          | NA     | 0.35               | 0.13                  |
| neuropile                 | 2.86                 | 0.35 | 2.86   | 0.35 | 2.29                    | 0.71 | 3.00   | 0.00 | 0.15          | 0.45   | 1.00               | 0.13                  |
| Johnston's organ          | 1.56                 | 0.38 | 2.94   | 0.17 | 1.38                    | 0.36 | 2.17   | 0.43 | 0.38          | <0.01  | <0.001             | <0.01                 |
| Ommatidia                 | 2.97                 | 0.09 | 2.96   | 0.10 | 2.08                    | 0.29 | 2.91   | 0.17 | <0.001        | 0.47   | -                  | -                     |
| Follicular epithelium     | 1.40                 | 0.34 | 1.93   | 0.47 | 0.52                    | 0.47 | 1.09   | 0.15 | <0.01         | <0.01  | <0.05              | <0.05                 |
| Undeveloped egg follicles | NQ                   | NQ   | NQ     | NQ   | NQ                      | NQ   | NQ     | NQ   | NQ            | NQ     | -                  | -                     |
| Developed egg follicles   | 0.02                 | 0.06 | 0.00   | 0.00 | NA                      | NA   | NA     | NA   |               |        | -                  | -                     |
| Oviducts                  | 1.62                 | 0.36 | 2.48   | 0.66 | 0.33                    | 0.47 | 2.50   | 0.50 | <0.05         | 1.00   | <0.05              | <0.05                 |
| Spermathecae              | 0.00                 | 0.00 | 0.00   | 0.00 | 0.00                    | 0.00 | 0.00   | 0.00 | NA            | NA     | -                  | -                     |
| Esophagus                 | 2.44                 | 0.42 | 2.75   | 0.66 | 2.63                    | 0.41 | 3.00   | 0.00 | 0.48          | 0.62   | <0.05              | 0.27                  |
| Epithelium of the cardia  | 2.04                 | 0.74 | 2.90   | 0.30 | 2.67                    | 0.47 | 2.25   | 0.83 | 0.21          | 0.09   | <0.01              | 0.55                  |
| Muscle of the cardia      | 0.06                 | 0.17 | 1.56   | 0.83 | 0.75                    | 0.25 | 2.00   | 0.00 | <0.05         | 0.57   | <0.01              | 0.67                  |
| Epithelium of the midgut  | 0.06                 | 0.16 | 0.93   | 0.47 | 0.10                    | 0.23 | 0.40   | 0.49 | 0.78          | 0.12   | <0.001             | 0.24                  |
| Muscle of the midgut      | 1.69                 | 0.42 | 1.52   | 0.50 | 1.46                    | 0.38 | 1.00   | 0.00 | 0.30          | 0.06   | 0.40               | <0.05                 |
| Pyloric chamber           | 1.00                 | 1.17 | 2.06   | 0.66 | 2.44                    | 0.42 | 3.00   | 0.00 | 0.21          | 0.09   | 0.16               | 0.20                  |
| Malpighian tubules        | 1.24                 | 0.65 | 1.53   | 0.60 | 0.53                    | 0.34 | 0.58   | 0.43 | <0.01         | <0.01  | 0.19               | 0.86                  |
| Small and large intestine | 1.50                 | 0.42 | 2.60   | 0.42 | 1.50                    | 0.41 | 1.80   | 1.47 | 1.00          | 0.75   | <0.01              | 0.64                  |
| Rectum epithelium         | 2.11                 | 0.39 | 2.58   | 0.61 | 1.88                    | 0.74 | 3.00   | 0.00 | 0.40          | 0.22   | 0.14               | <0.05                 |
| Rectum glands             | 1.38                 | 0.54 | 2.79   | 0.37 | 0.75                    | 0.83 | 2.83   | 0.24 | 0.22          | 1.00   | <0.01              | <0.05                 |
| Apical cavities           | NQ                   | NQ   | NQ     | NQ   | NQ                      | NQ   | NQ     | NQ   | NQ            | NQ     | -                  | -                     |
| Acinar cells              | 1.62                 | 0.66 | 2.01   | 0.66 | 1.82                    | 0.19 | 2.82   | 0.21 | 0.41          | <0.01  | 0.07               | <0.01                 |
| Fat body                  | 1.42                 | 0.46 | 1.78   | 0.85 | 2.28                    | 0.42 | 2.38   | 0.57 | <0.01         | 0.16   | 0.22               | 0.89                  |

NQ: not quantifiable. NA: not available.
